# Supplementary material for: PMDETA as an efficient catalyst for bulk reversible complexation mediated polymerization (RCMP) in the absence of additional metal salts and deoxygenation
Source: Royal Society of Chemistry journal article supplement (doi:10.1039/c6ra20164d), 2016-01-01
Supplement: c6ra20164d1.pdf [file c6ra20164d1.pdf]

## Supporting Information

### **PMDETA as an Efficient Catalyst for Bulk Reversible Complexation Mediated Polymerization (RCMP) in the Absence of Additional Metal Salts and Deoxygenation**

Wenxiang Wang<sup>a</sup>, Liangjiu Bai<sup>\*a</sup>, Hou Chen<sup>\*a</sup>, Hui Xu<sup>a</sup>, Yuzhong Niu<sup>a</sup>, Qian Tao<sup>a</sup>,  
Zhenping Cheng<sup>b</sup>

*<sup>a</sup>School of Chemistry and Materials Science, Ludong University, Yantai 264025, China. E-mail: bailiangjiu@163.com (L. J. Bai); ldupolymchen@163.com*

*<sup>b</sup>Jiangsu Key Laboratory of Advanced Functional Polymer Design and Application, Department of Polymer Science and Engineering, College of Chemistry, Chemical Engineering and Materials Science, Soochow University, Suzhou, 215123, China.*

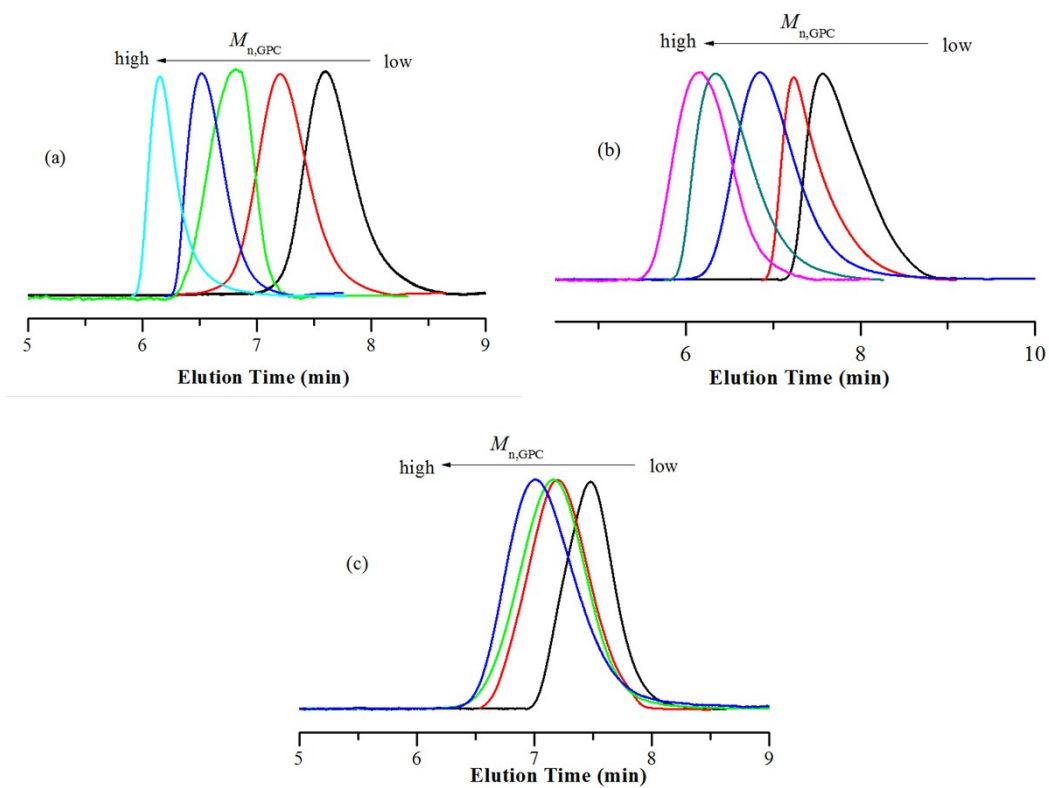

**Figure S1.** GPC traces of PMMA prepared by RCMPs of MMA under different conditions. Polymerization conditions: (a)  $[MMA]_0:[CPI]_0:[PMDETA]_0:[I_2]_0 = 400:1:0.5:0.2$ ; (b)  $[MMA]_0:[CPI]_0:[TEA]_0:[I_2]_0 = 400:1:0.5:0.2$ ; (c)  $[MMA]_0:[CPI]_0:[TMEDA]_0:[I_2]_0 = 400:1:0.5:0.2$ .

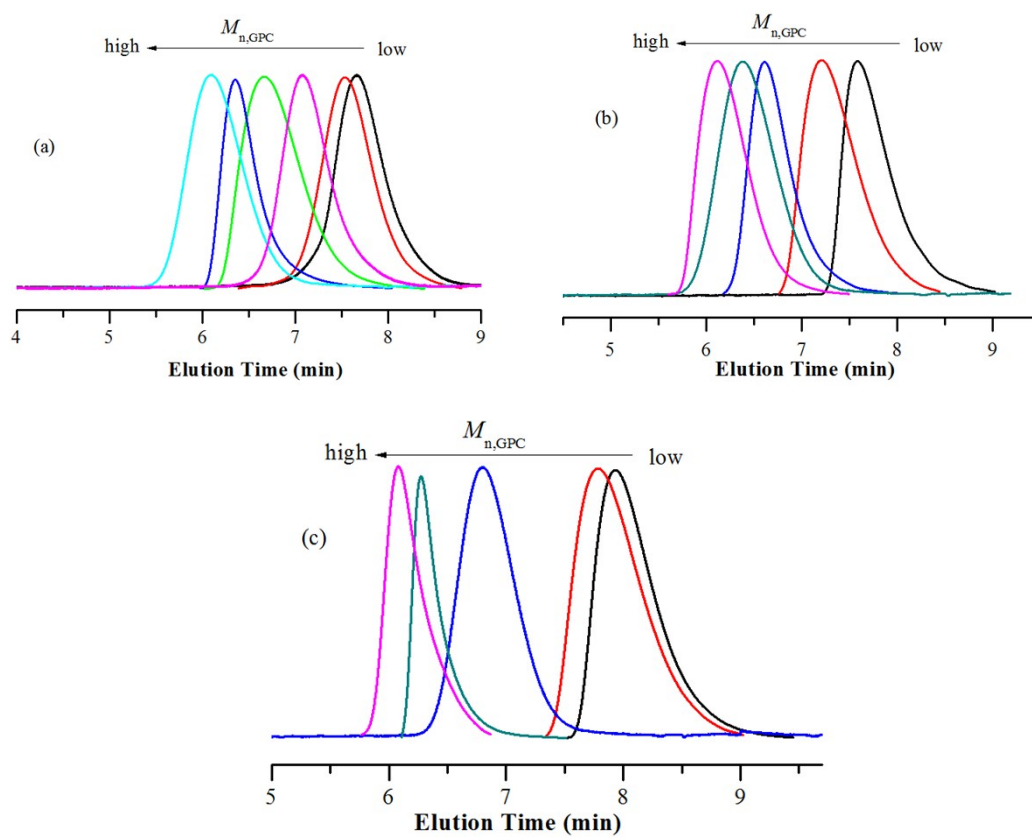

**Figure S2.** GPC traces of PMMA prepared by RCMPs of MMA under different conditions. Polymerization conditions: (a)  $[MMA]_0:[CPI]_0:[PMDETA]_0:[I_2]_0 = 400:1:0.5:0.2$ ; (b)  $[MMA]_0:[CPI]_0:[PMDETA]_0:[I_2]_0 = 400:1:1:0.2$ ; (c)  $[MMA]_0:[CPI]_0:[PMDETA]_0:[I_2]_0 = 400:1:2:0.2$ .

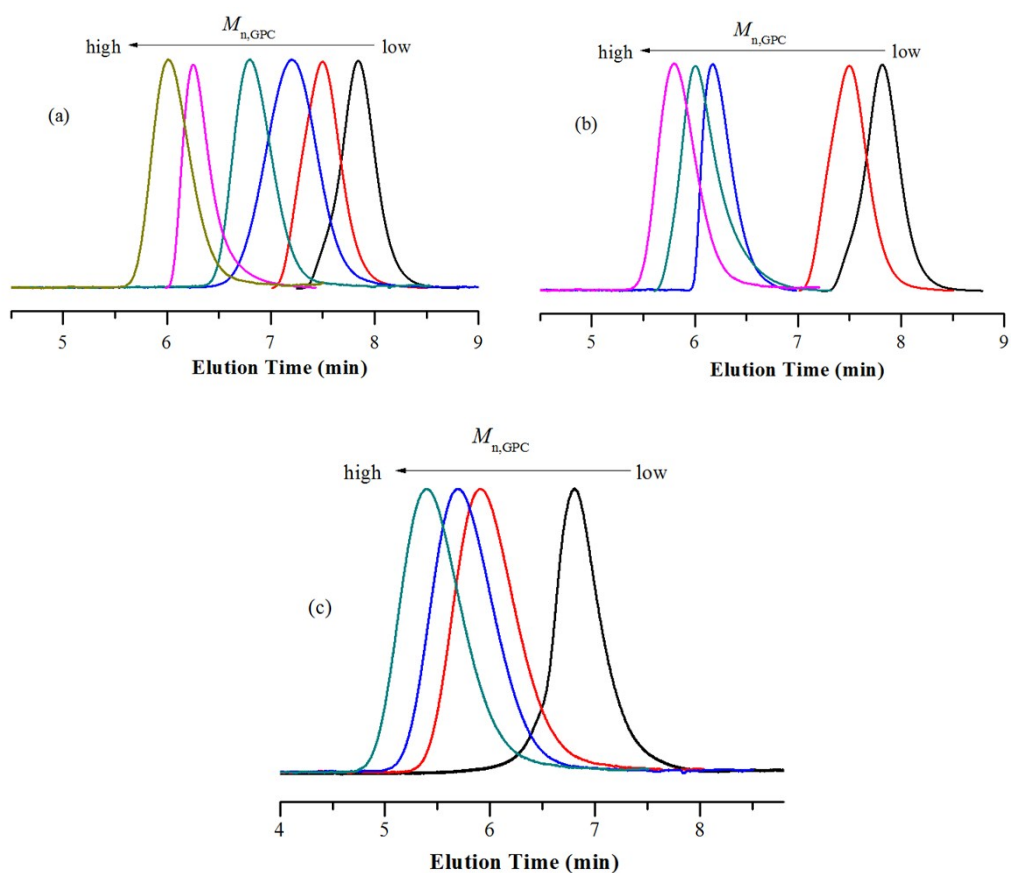

**Figure S3.** GPC traces of PMMA prepared by RCMPs of MMA under different conditions. Polymerization conditions: (a) [MMA]<sub>0</sub>: [CPI]<sub>0</sub>: [PMDETA]<sub>0</sub>: [I<sub>2</sub>]<sub>0</sub> = 500:1:0.5:0.2; (b) [MMA]<sub>0</sub>: [CPI]<sub>0</sub>: [PMDETA]<sub>0</sub>: [I<sub>2</sub>]<sub>0</sub> = 500:0.5:0.5:0.2; (c) [MMA]<sub>0</sub>: [CPI]<sub>0</sub>: [PMDETA]<sub>0</sub>: [I<sub>2</sub>]<sub>0</sub> = 500:0.25:0.5:0.2.

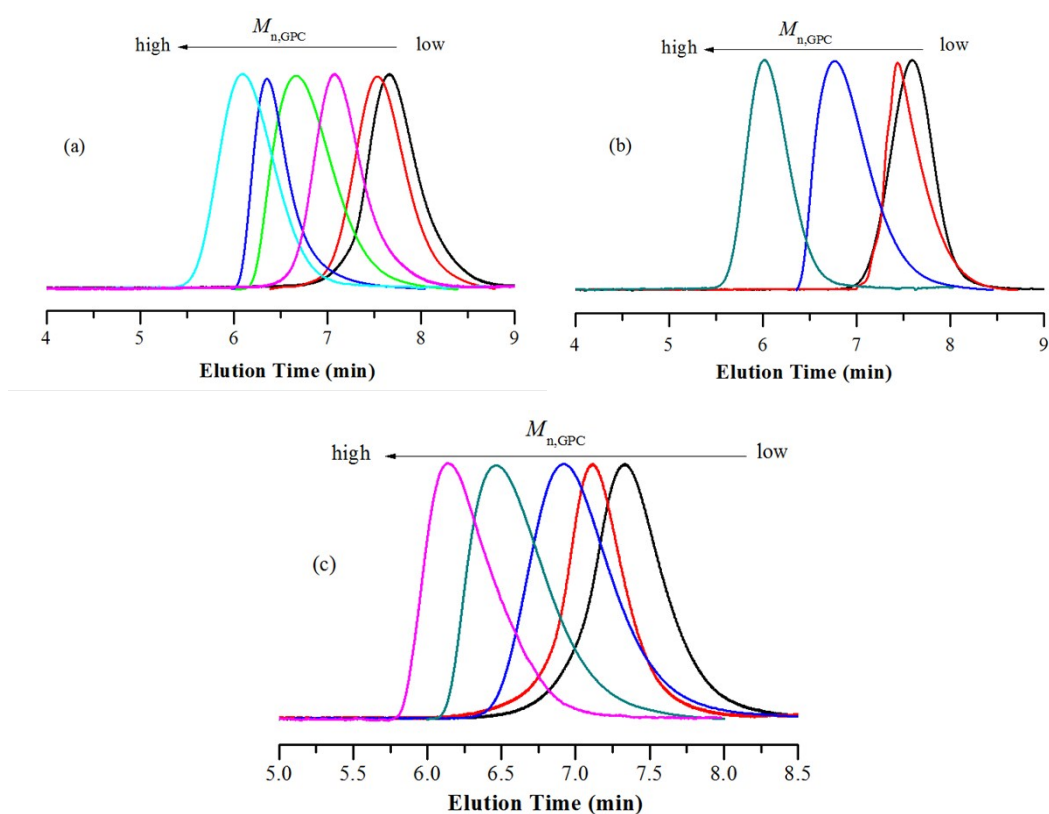

**Figure S4.** GPC traces of PMMA prepared by RCMPs of MMA under different conditions. Polymerization conditions: (a)  $[MMA]_0:[CPI]_0:[TEMED]_0:[I_2]_0 = 400:1:0.5:0.2$ ; (b)  $[MMA]_0:[CPI]_0:[PMDETA]_0:[I_2]_0 = 400:1:0.5:0.1$ ; (c)  $[MMA]_0:[CPI]_0:[PMDETA]_0:[I_2]_0 = 400:1:0.5:0.01$ .
